# Supplementary material for: Optical and Structural Characteristics of Rare Earth-Doped ZnO Nanocrystals Prepared in Colloidal Solution
Source: MDPI journal article supplement (doi:10.3390/photochem2030036), 2022-07-02
Supplement: s1 [file s1]

# Supplementary Materials

## Optical and Structural Characteristics of Rare-Earth-Doped ZnO Nanocrystals Prepared in Colloidal Solution

Maria Toma<sup>1</sup>, Oleksandr Selyshchev<sup>2,3,\*</sup>, Yevhenii Havryliuk<sup>2,3,4</sup>, Aurel Pop<sup>1</sup>, and Dietrich R. T. Zahn<sup>2,3</sup>

<sup>1</sup>Babes-Bolyai University, Physics Faculty, M. Kogalniceanu No.1, 400084, Cluj-Napoca, Romania;

<sup>2</sup>Semiconductor Physics, Chemnitz University of Technology, 09126 Chemnitz, Germany;

<sup>3</sup>Center for Materials, Architectures, and Integration of Nanomembranes (MAIN), Chemnitz University of Technology, 09126 Chemnitz, Germany;

<sup>4</sup>V. E. Lashkaryov Institute of Semiconductor Physics NAS of Ukraine, 03028, Kyiv, Ukraine;

\* e-mail: [oleksandr.selyshchev@physik.tu-chemnitz.de](mailto:oleksandr.selyshchev@physik.tu-chemnitz.de)

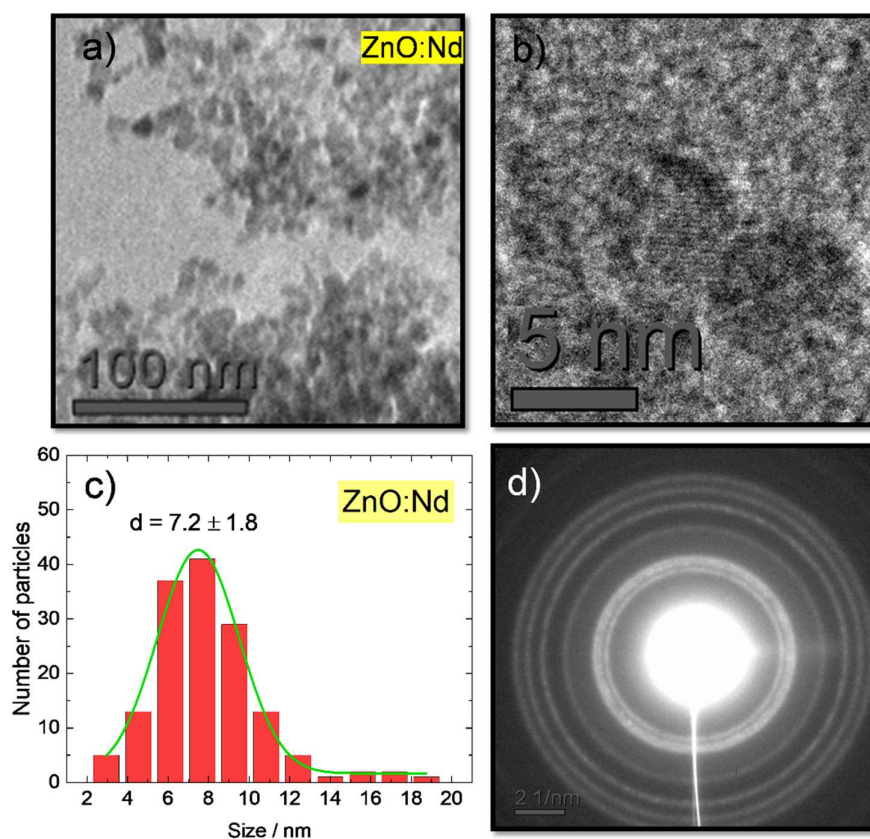

**Figure S1.** (a,b) TEM overview and HRTEM image of Nd doped ZnO NCs; (c) statistical distribution of ZnO:Nd NCs; (d) SAED pattern (wurtzite phase) of ZnO:Nd NCs.

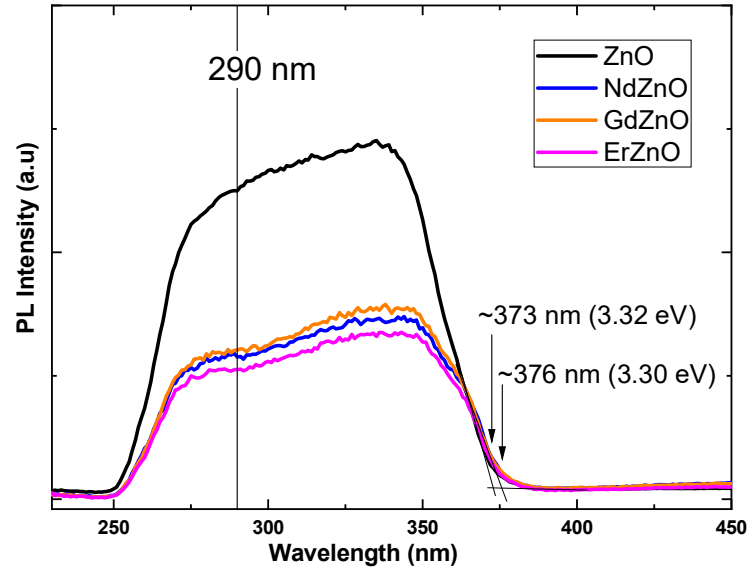

**Figure S2.** PL excitation (PLE) spectra for pristine and RE doped ZnO NCs registered at  $\lambda = 550$  nm. Based on these results,  $\lambda_{ex.} = 290$  nm was chosen for excitation of the PL spectra reported in the manuscript. The second order contribution was cut using a 295 nm cutoff filter for the luminescence and a 430 nm cutoff filter for the excitation spectra. As can be seen, the PL excitation in ZnO NCs starts at  $\sim 373$  nm (3.30 eV) for undoped and  $\sim 376$  nm (3.32 eV) for RE doped samples, which is close to the bandgap determined from the UV-vis absorption spectra.

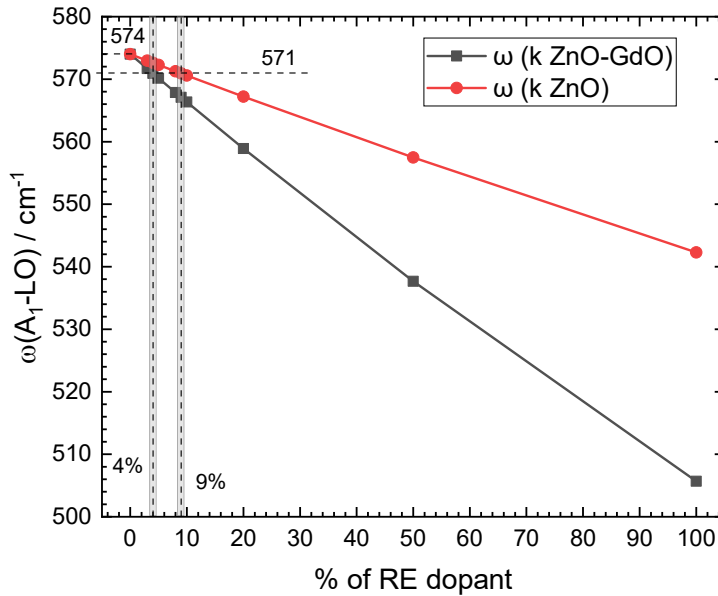

**Figure S3.** A simplified model of the frequency shift when doping with RE atoms.  $\omega(k ZnO)$  takes into account only the effect of the reduced mass different to that of ZnO according to the equations (1,2).  $\omega(k ZnO - GdO)$  considers both the mass effect and the force constant according to equation (3).

$$\mu = \frac{m_{Zn} \cdot m_O}{m_{Zn} + m_O} \quad (1)$$

$$\mu(d) = d \cdot \frac{m_{dopant} \cdot m_O}{m_{dopant} + m_O} + (1 - d) \cdot \frac{m_{Zn} \cdot m_O}{m_{Zn} + m_O} \quad (2)$$

where  $m_{Zn}, m_O, m_{dopant}$  – the atomic masses of Zn, O, and RE dopants,  $\mu$  - the reduced atomic mass,  $d$  – the dopant concentration.

$$k(d) = k(ZnO) \cdot \frac{L(Zn - O)}{L(dopant - O) + (1 - d) \cdot L(Zn - O)} \quad (3)$$

Where  $k(ZnO)$  and  $k(d)$  – force constants for pristine ZnO and RE-doped ZnO with the dopant level  $d$ .  $L(Zn-O)$  and  $L(dopant-O)$  atomic distances between ZnO and RE-O both in tetrahedral coordination.

$$\omega = \frac{1}{2\pi} \cdot \sqrt{\frac{k(d)}{\mu(d)}} \quad (4)$$

$\omega$  – Raman frequency of the mode in  $cm^{-1}$ .

Table S1. Number of atoms per spherical ZnO NC of wurtzite phase.

| D, nm                                                                                                                               | V (NC) = $\frac{4}{3}\pi R^3$ , nm <sup>3</sup> | N unit cells in the particle | O + Zn atoms | Zn atoms |
|-------------------------------------------------------------------------------------------------------------------------------------|-------------------------------------------------|------------------------------|--------------|----------|
| 1                                                                                                                                   | 0.5230                                          | 11                           | 44           | 22       |
| 2                                                                                                                                   | 4.186                                           | 89                           | 355          | 178      |
| 3                                                                                                                                   | 14.13                                           | 300                          | 1198         | 599      |
| 4                                                                                                                                   | 33.49                                           | 710                          | 2840         | 1420     |
| 5                                                                                                                                   | 65.42                                           | 1387                         | 5546         | 2773     |
| 6                                                                                                                                   | 113.0                                           | 2396                         | 9583         | 4792     |
| 7                                                                                                                                   | 179.5                                           | 3805                         | 15218        | 7609     |
| 8                                                                                                                                   | 267.9                                           | 5679                         | 22716        | 11358    |
| 9                                                                                                                                   | 381.5                                           | 8086                         | 32344        | 16172    |
| 10                                                                                                                                  | 523.3                                           | 11092                        | 44367        | 22184    |
| a = 0.324 nm<br>c = 0.519 nm<br>V (unit cell) = 0.866 · a <sup>2</sup> c = 0.0472 nm <sup>3</sup> , where 0.866 is a packing factor |                                                 |                              |              |          |
